# Supplementary material for: MXene-based composite double-network multifunctional hydrogels as highly sensitive strain sensors
Source: Royal Society of Chemistry journal article supplement (doi:10.1039/d2tc00679k), 2022-01-01
Supplement: d2tc00679k1.pdf [file d2tc00679k1.pdf]

## **Supporting Information**

### **MXene-based composite double-network multifunctional hydrogels as highly sensitive strain sensors**

**Huixin Luan, Dongzhi Zhang\*, Zhenyuan Xu, Wenhao Zhao, Chunqing Yang,**

**Xiaoya Chen**

College of Control Science and Engineering, China University of Petroleum (East  
China), Qingdao 266580, China

\*Corresponding author: Dongzhi Zhang

E-mail address: dzzhang@upc.edu.cn

Tel: +86-532-86982928

Fax: +86-532-86981335

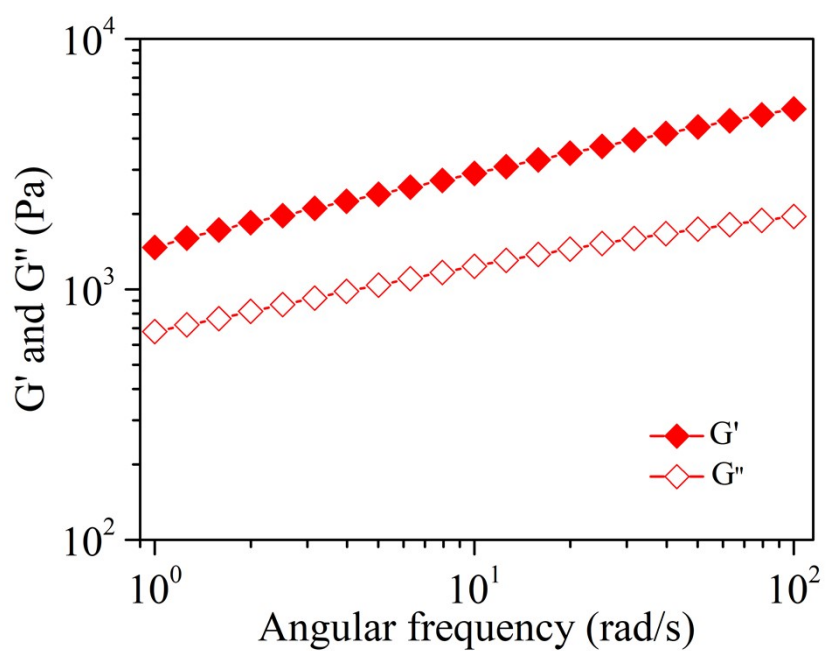

**Fig. S1.** Angular Frequency Sweep Measurements of Storage Modulus ( $G'$ ), Loss Modulus ( $G''$ ).

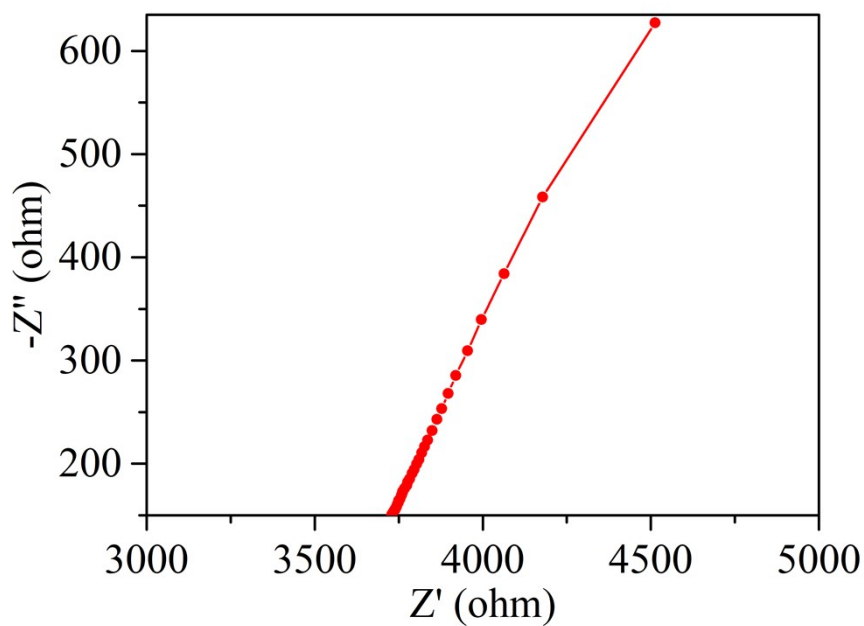

**Fig. S2.** The impedance spectroscopy of PAM/SA/MXene hydrogel.

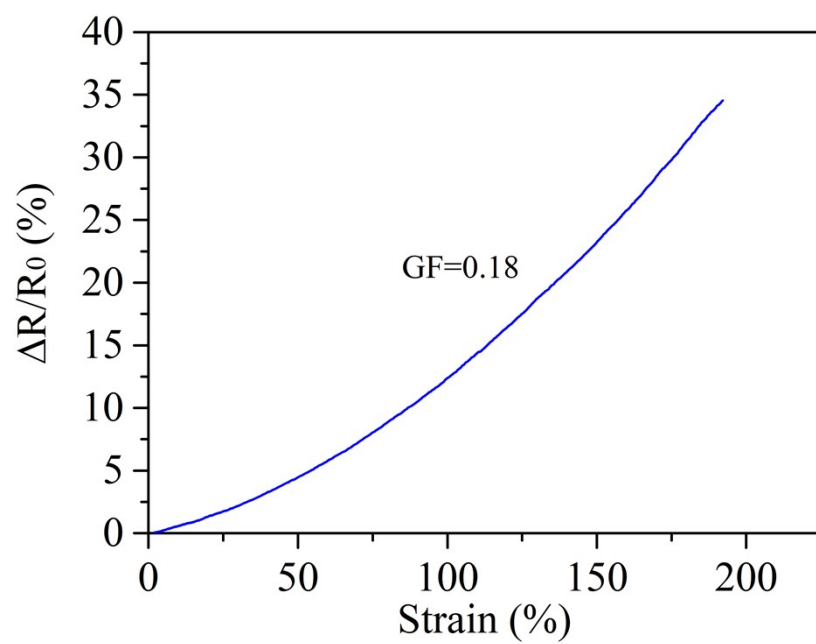

**Fig. S3.** Relative resistance changes of the hydrogel without MXene under different strains.
